# Supplementary material for: Immobilized TiO2 nanoparticles on carbon nanotubes: an efficient heterogeneous catalyst for the synthesis of chromeno[b]pyridine derivatives under ultrasonic irradiation
Source: PubMed Central journal article supplement — RSC Adv. 2019 Dec 17;9(71):41868–76. doi: 10.1039/c9ra09031b (PMC9092645; doi:10.1039/c9ra09031b), 2019-12-17

### Electronic Supplementary Information (ESI)

IR of 4a

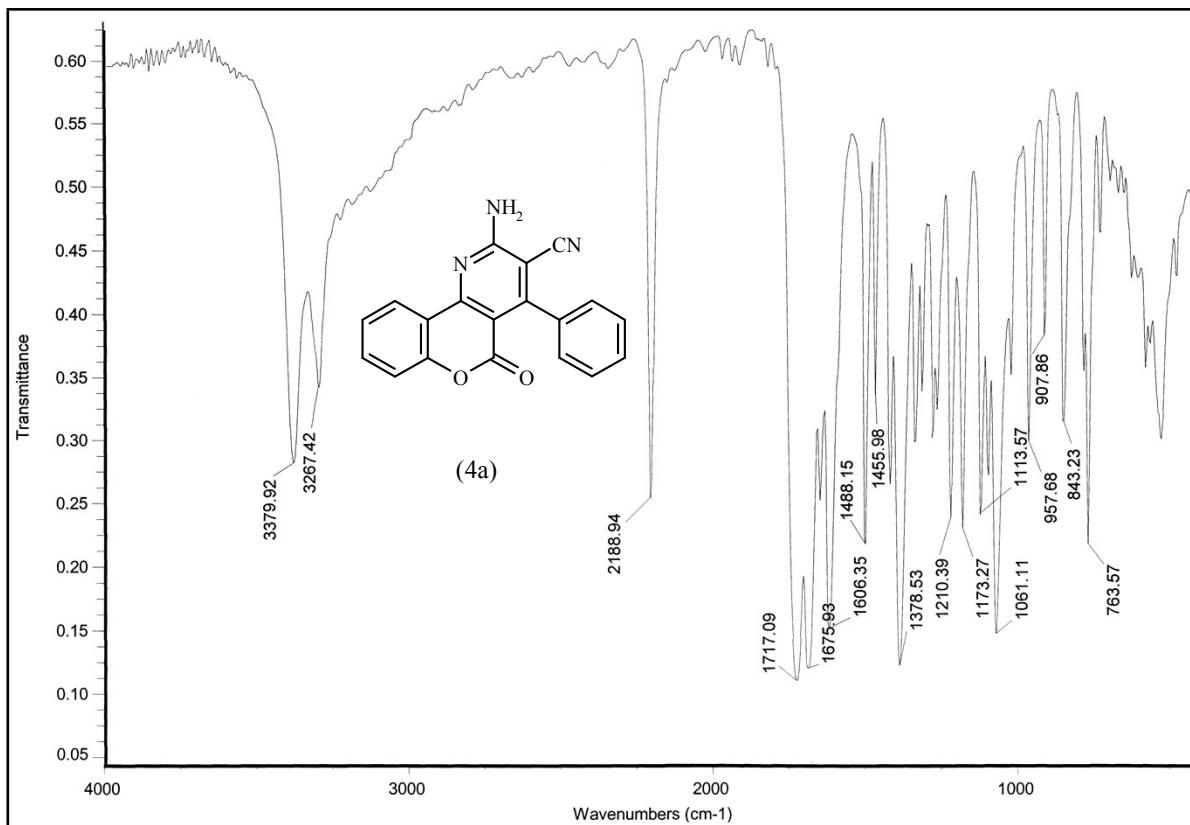

<sup>1</sup>H-NMR of 4a

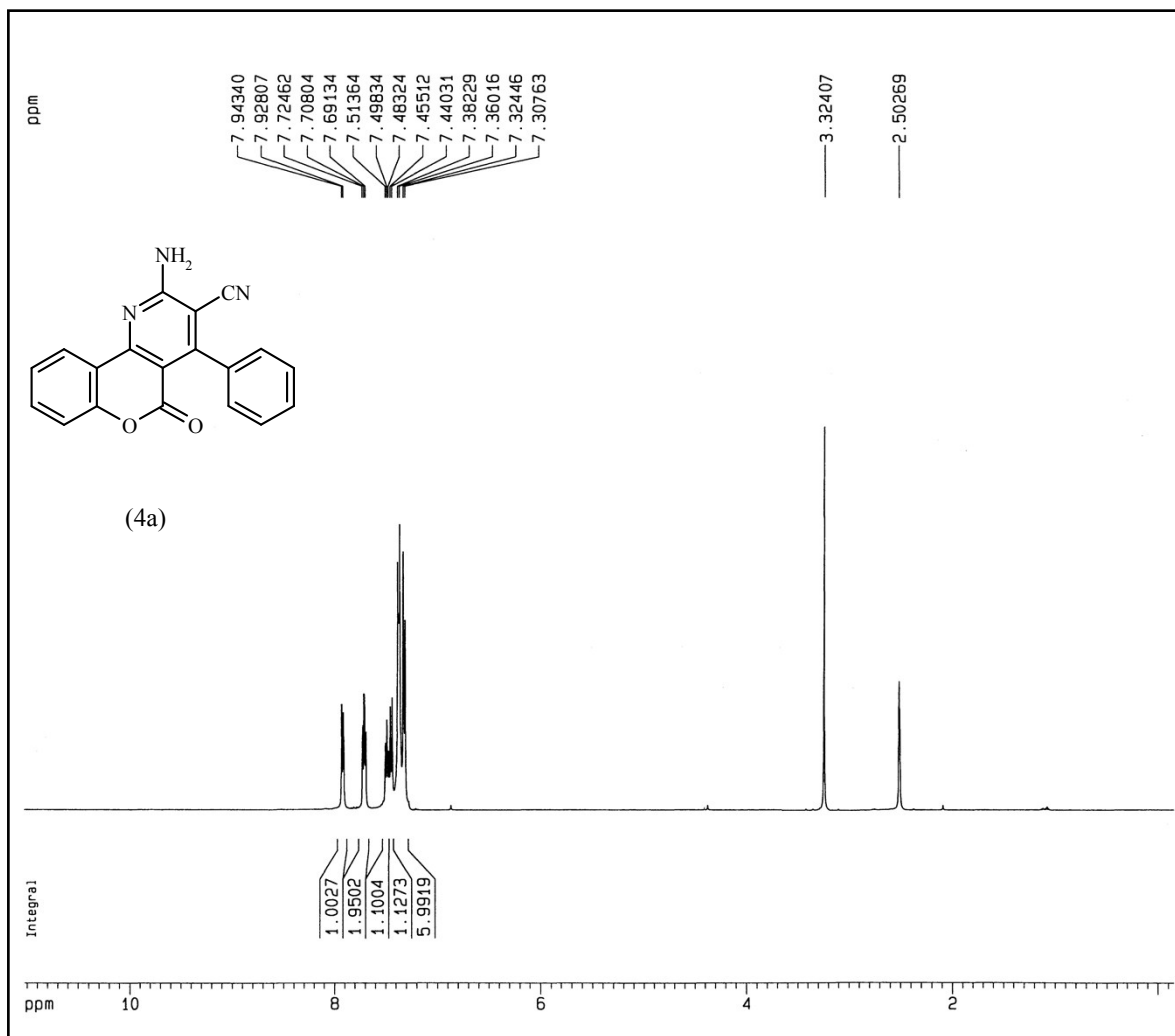

<sup>13</sup>C-NMR of 4a

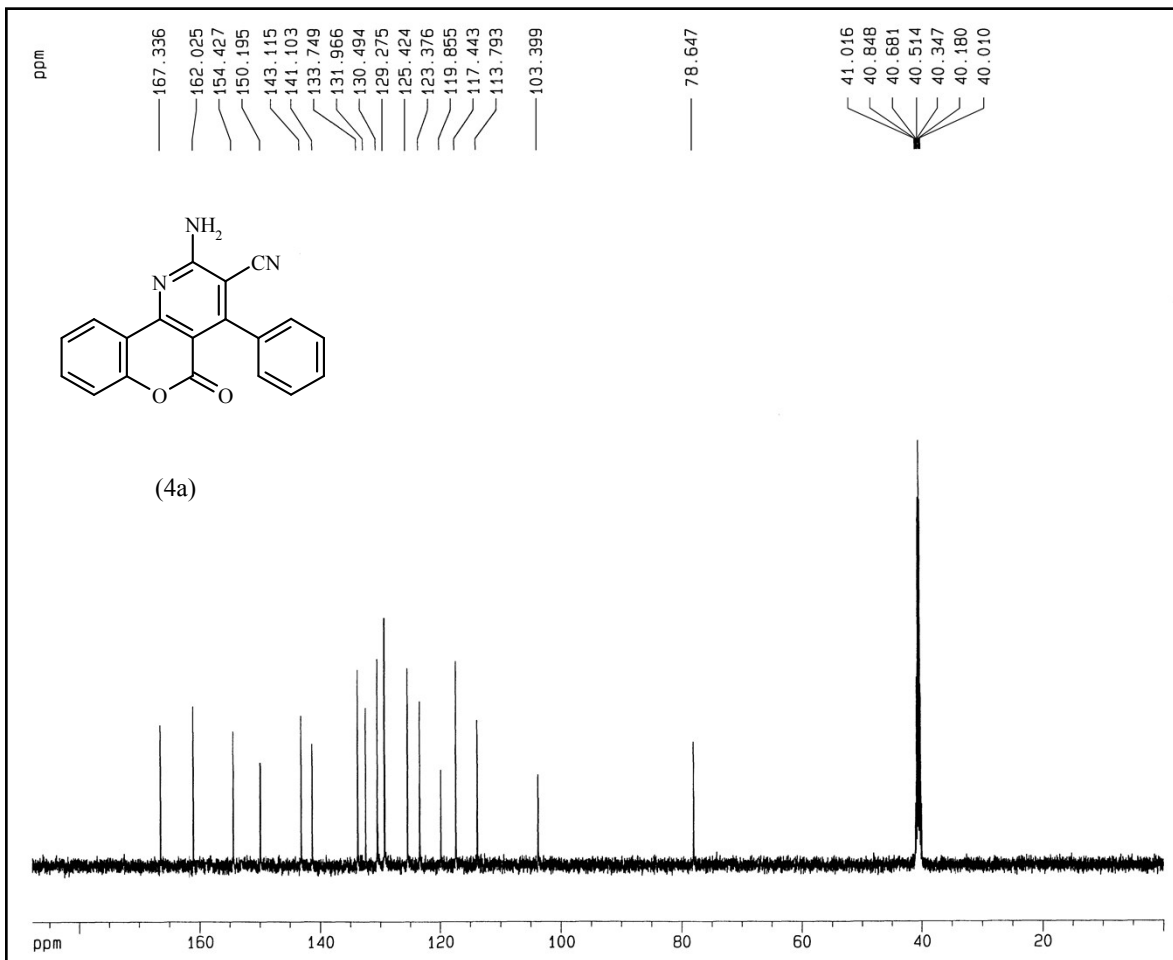

IR of 4b

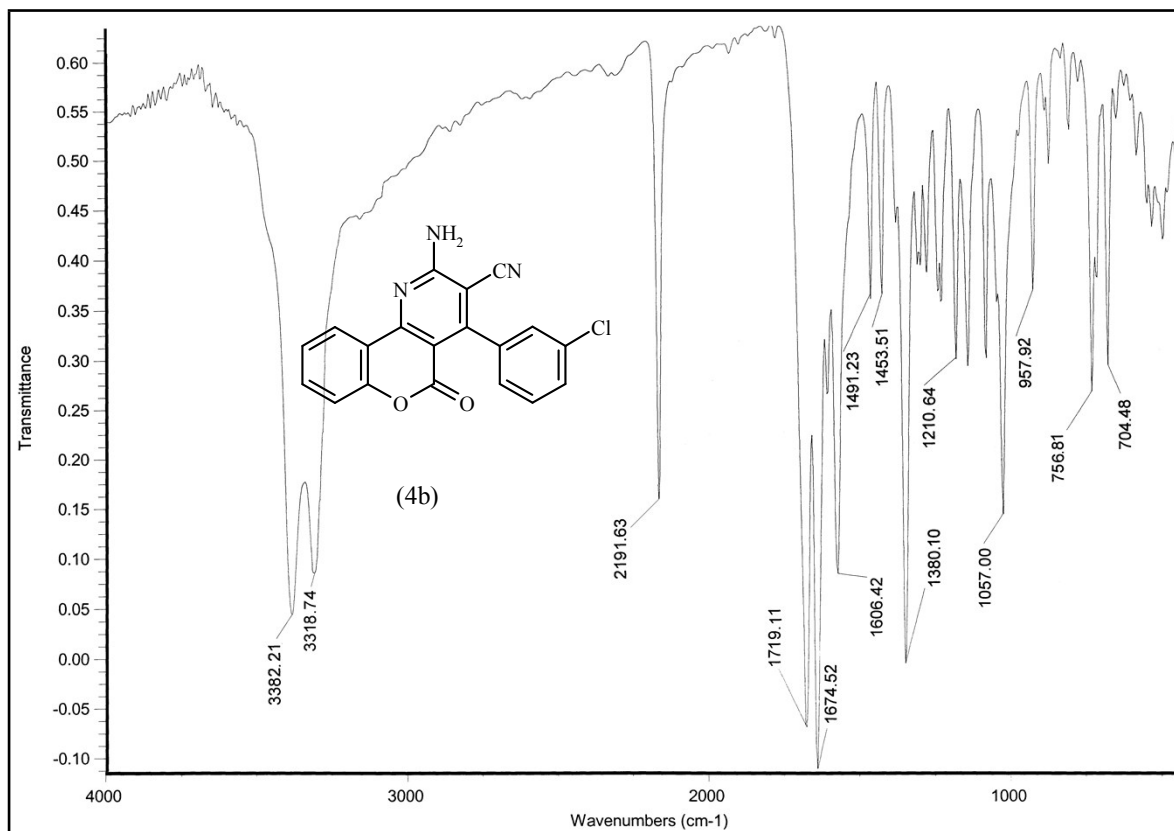

<sup>1</sup>H-NMR of 4b

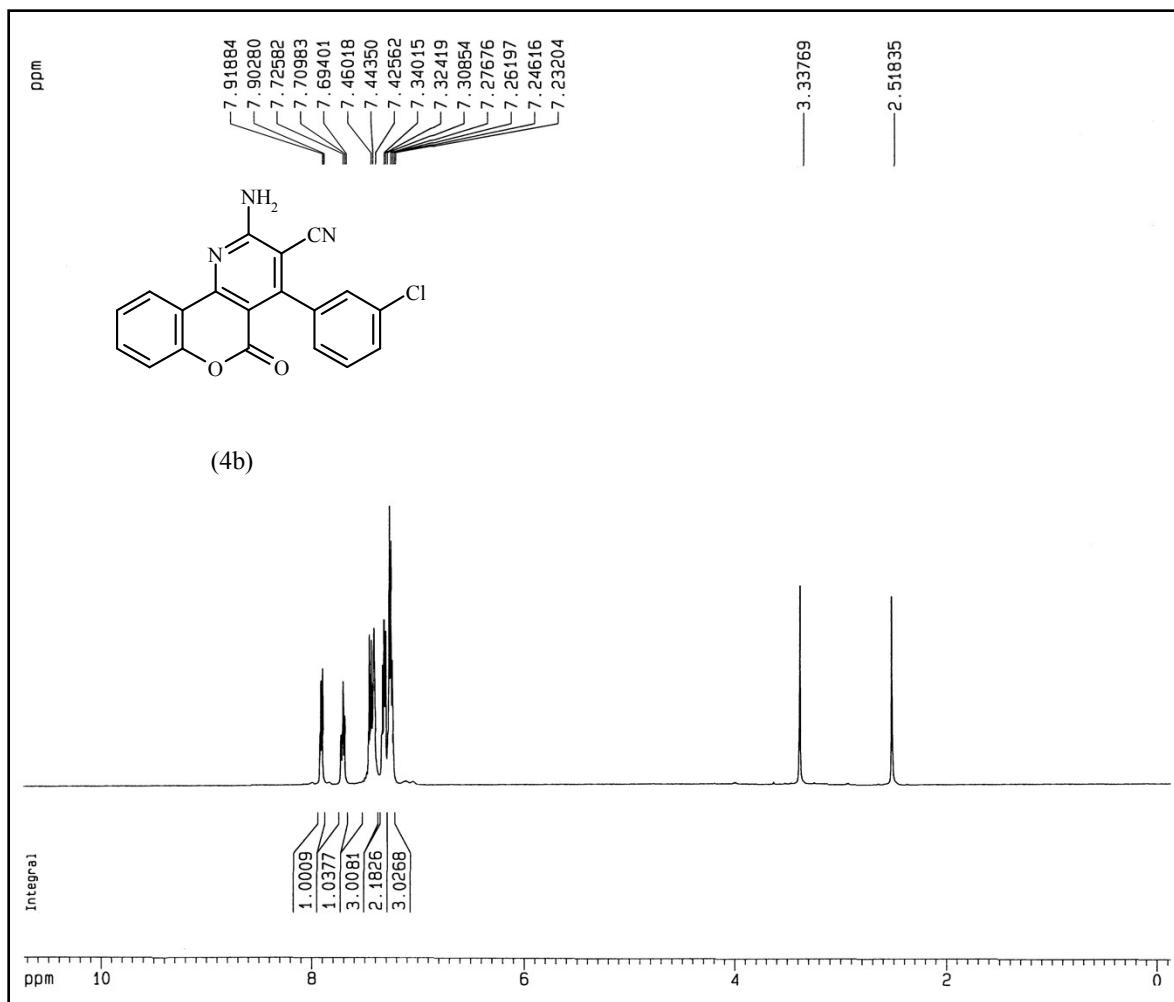

<sup>13</sup>C-NMR of 4b

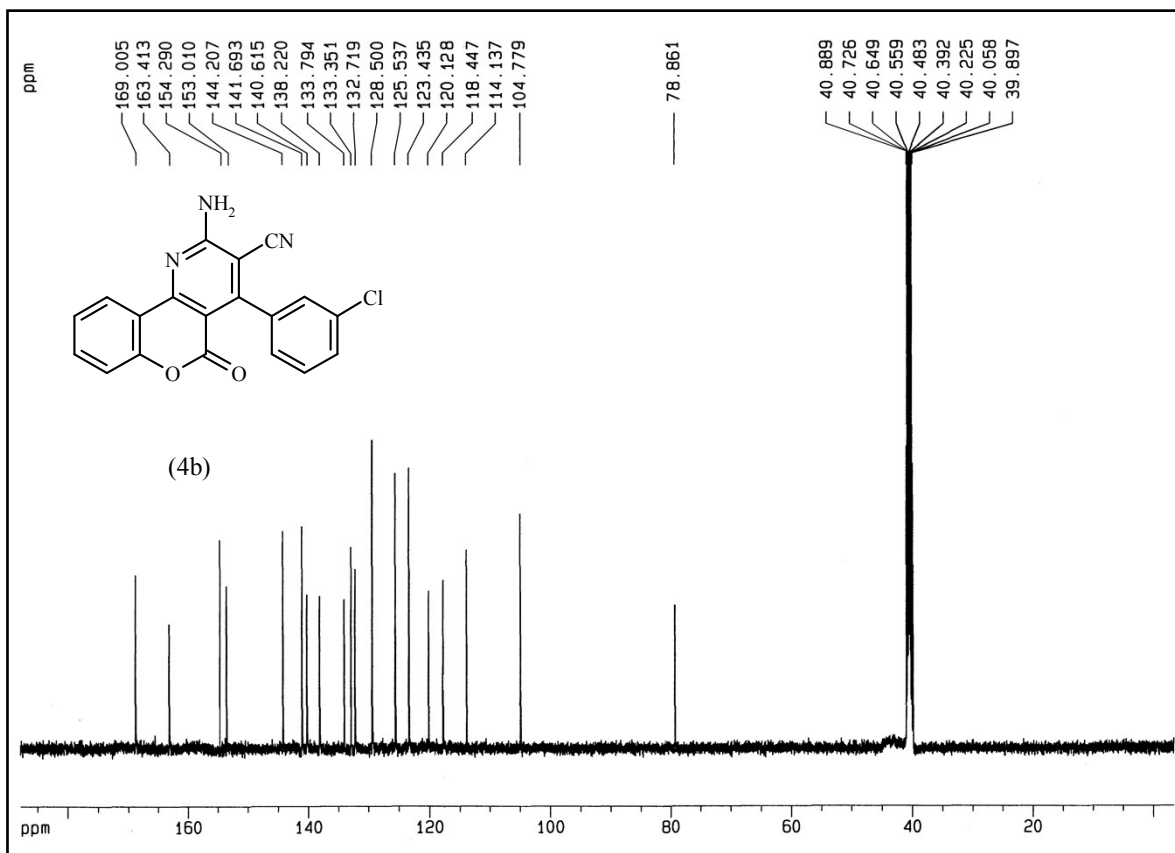

# IR of 4c

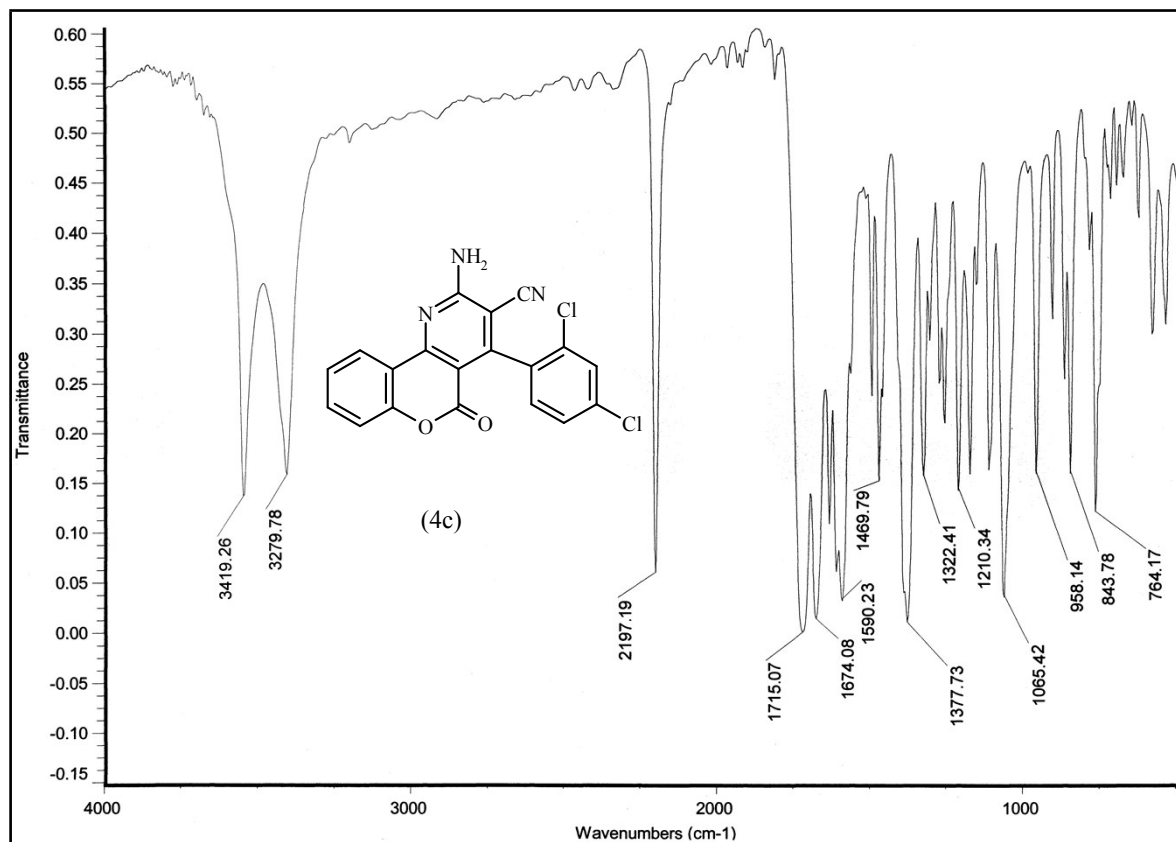

<sup>1</sup>H-NMR of 4c

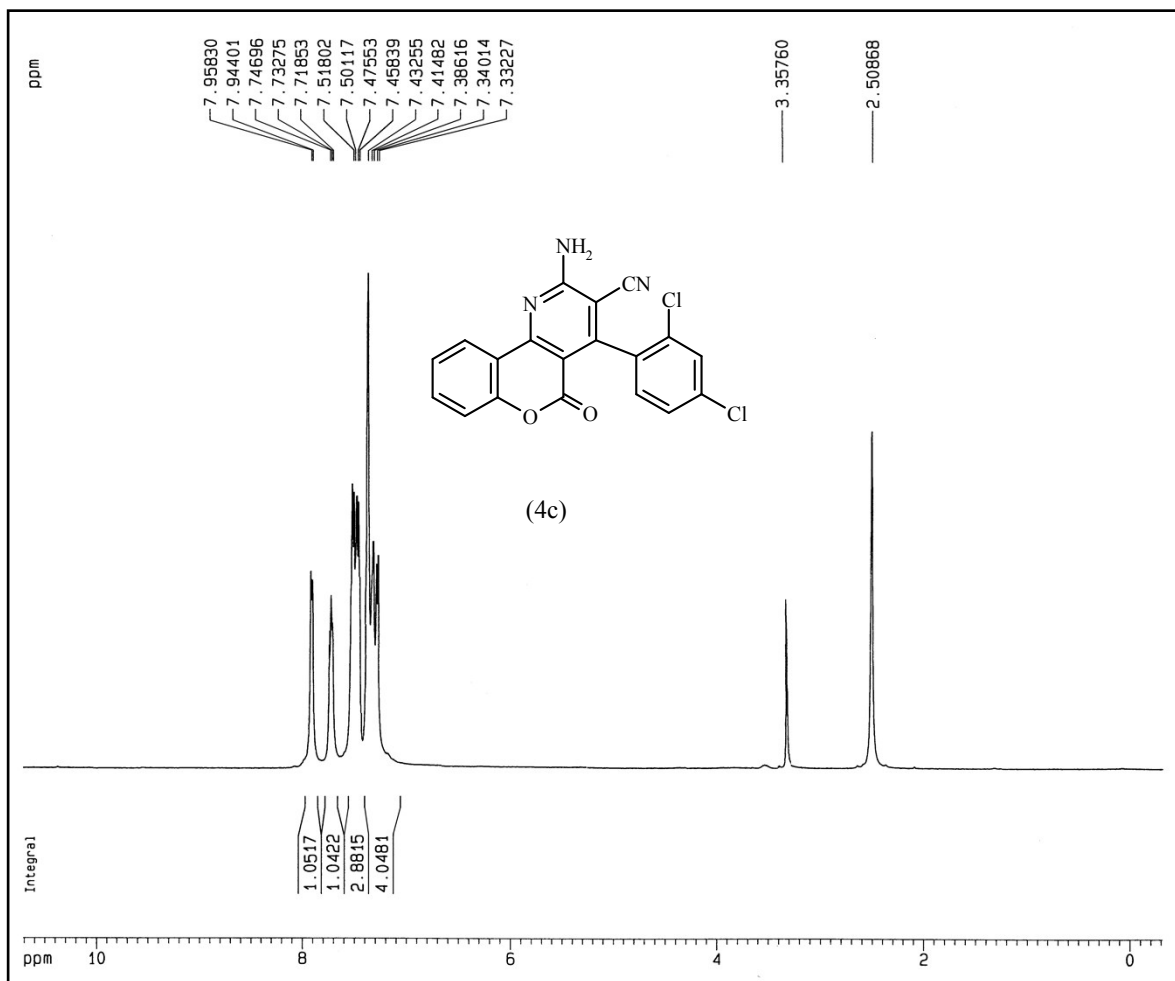



<sup>13</sup>C-NMR of 4c

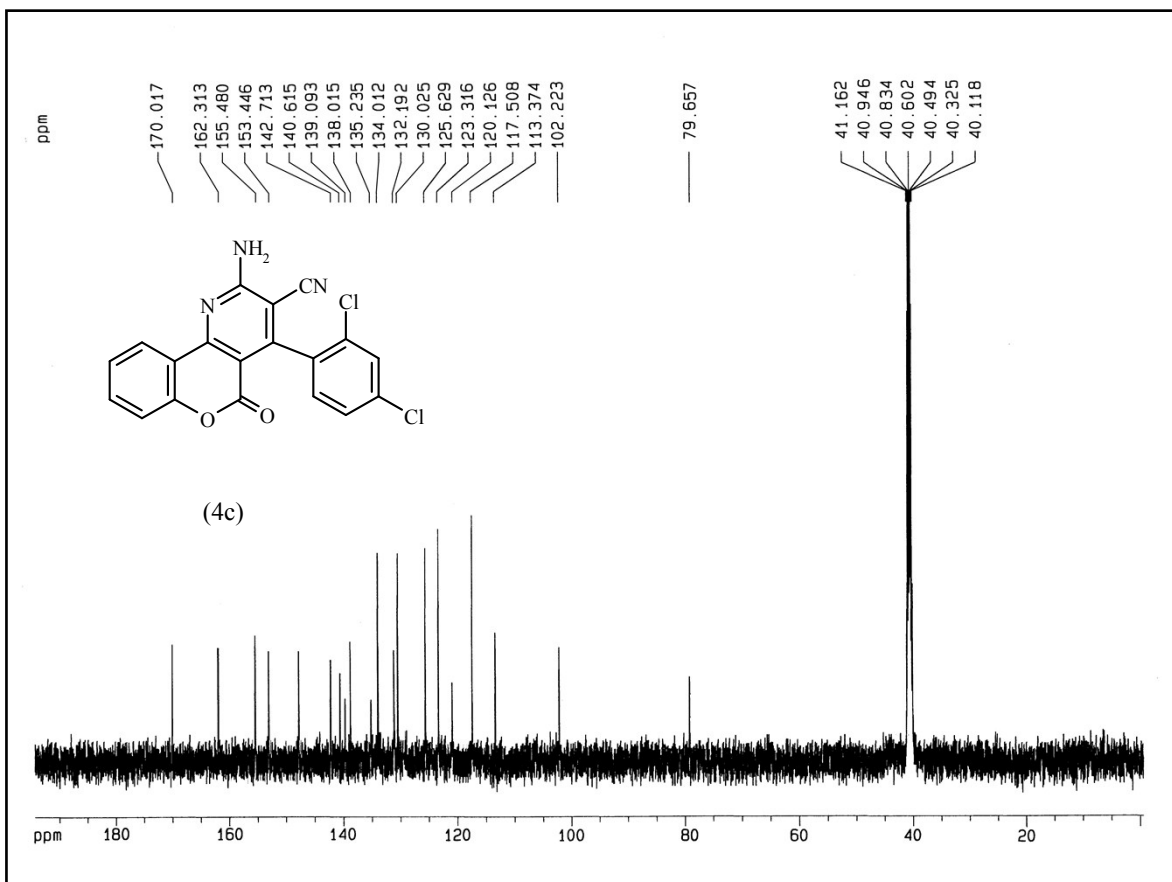

# IR of 4d

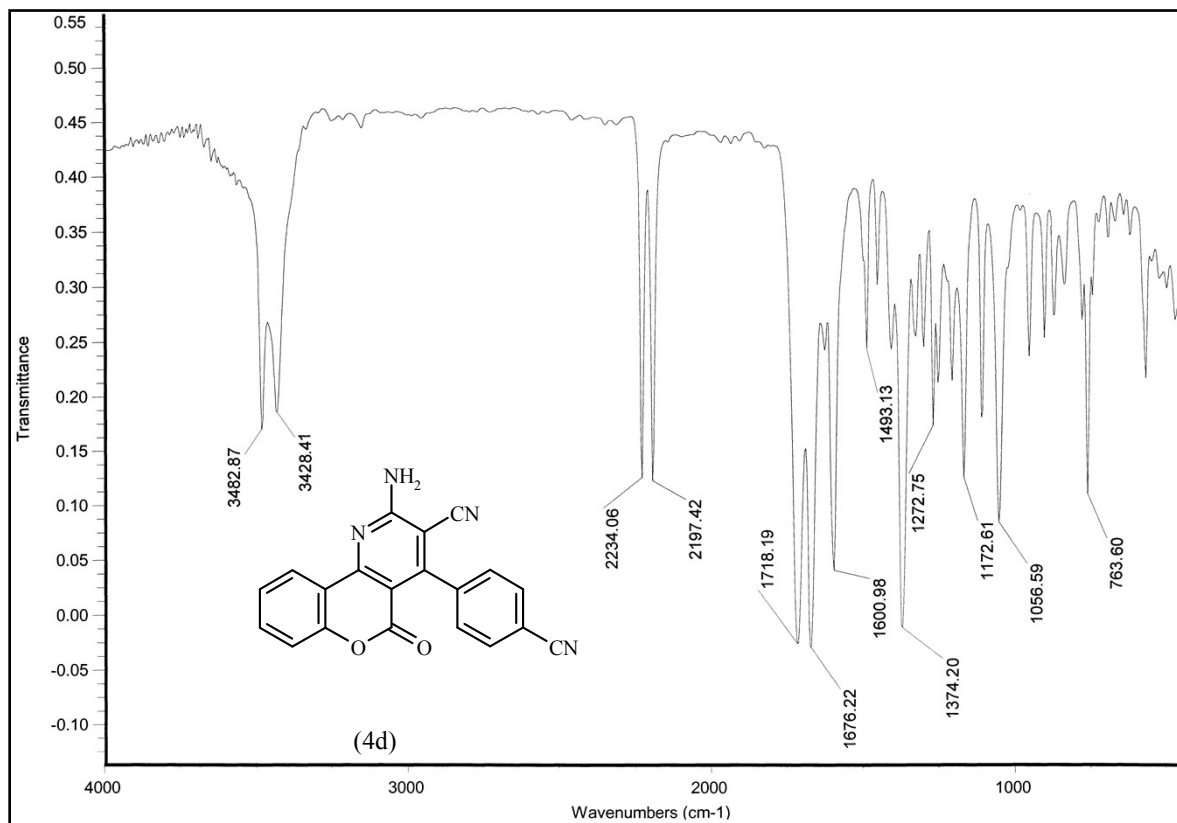

<sup>1</sup>H-NMR of 4d

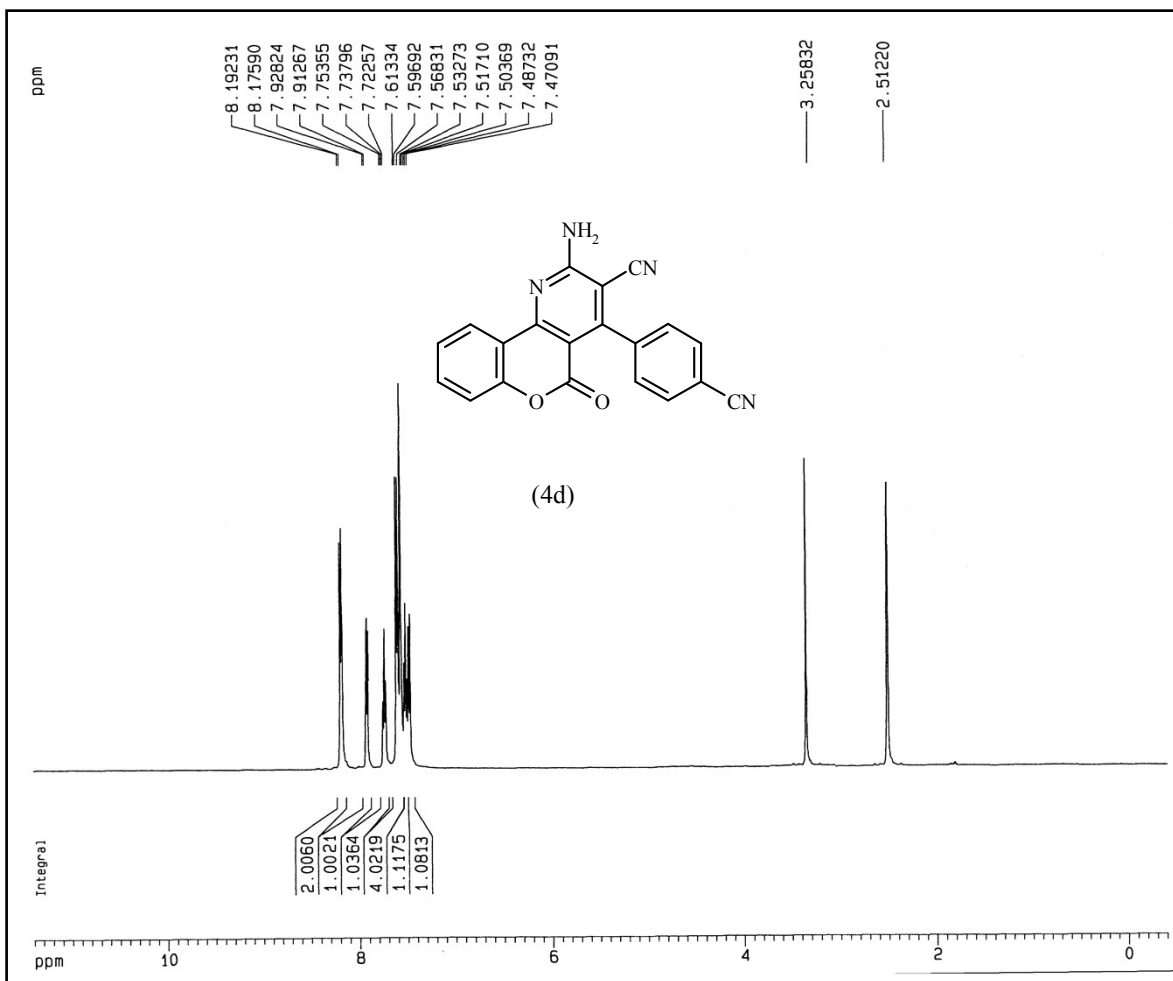

<sup>13</sup>C-NMR of 4d

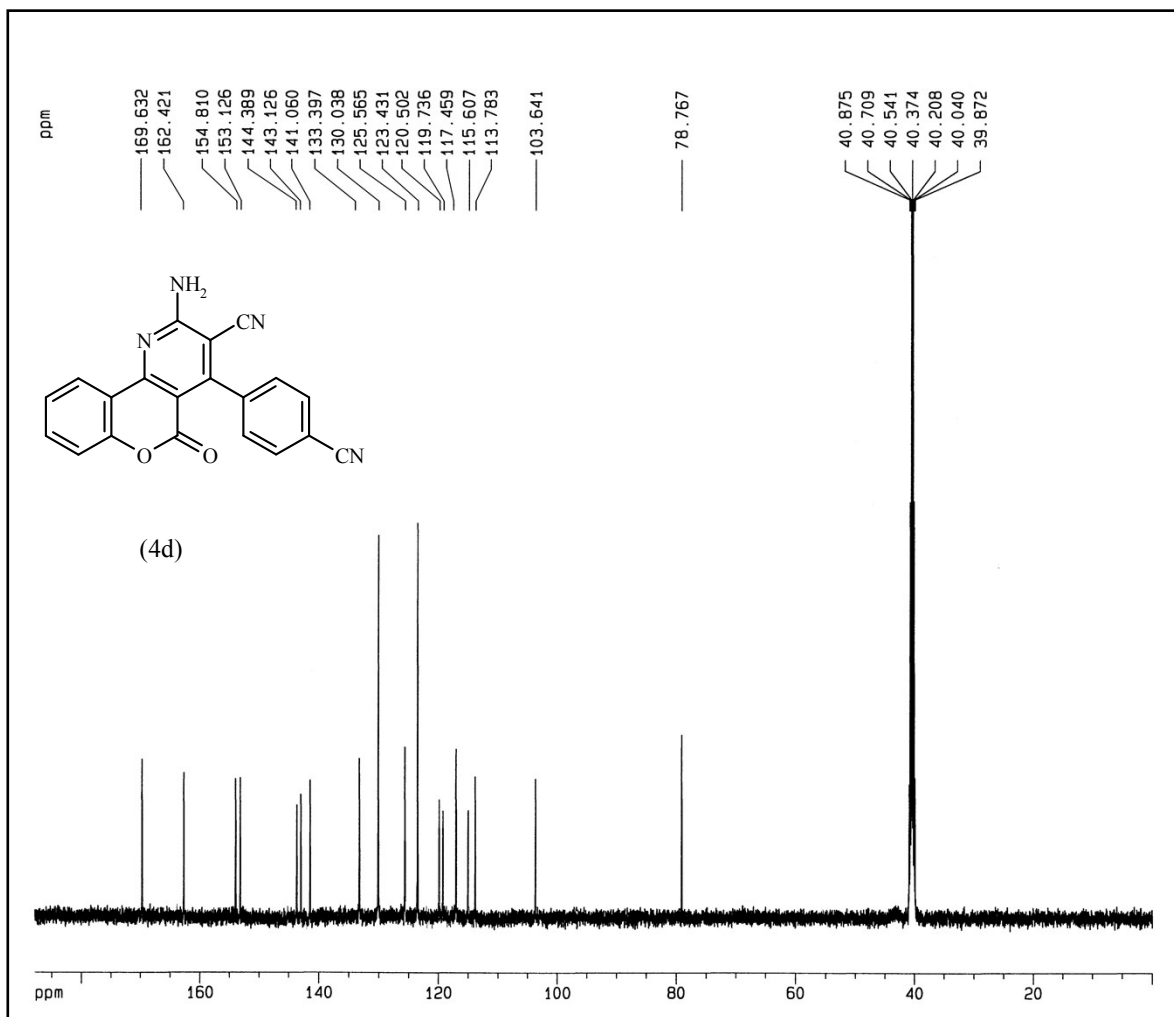

# IR of 4f

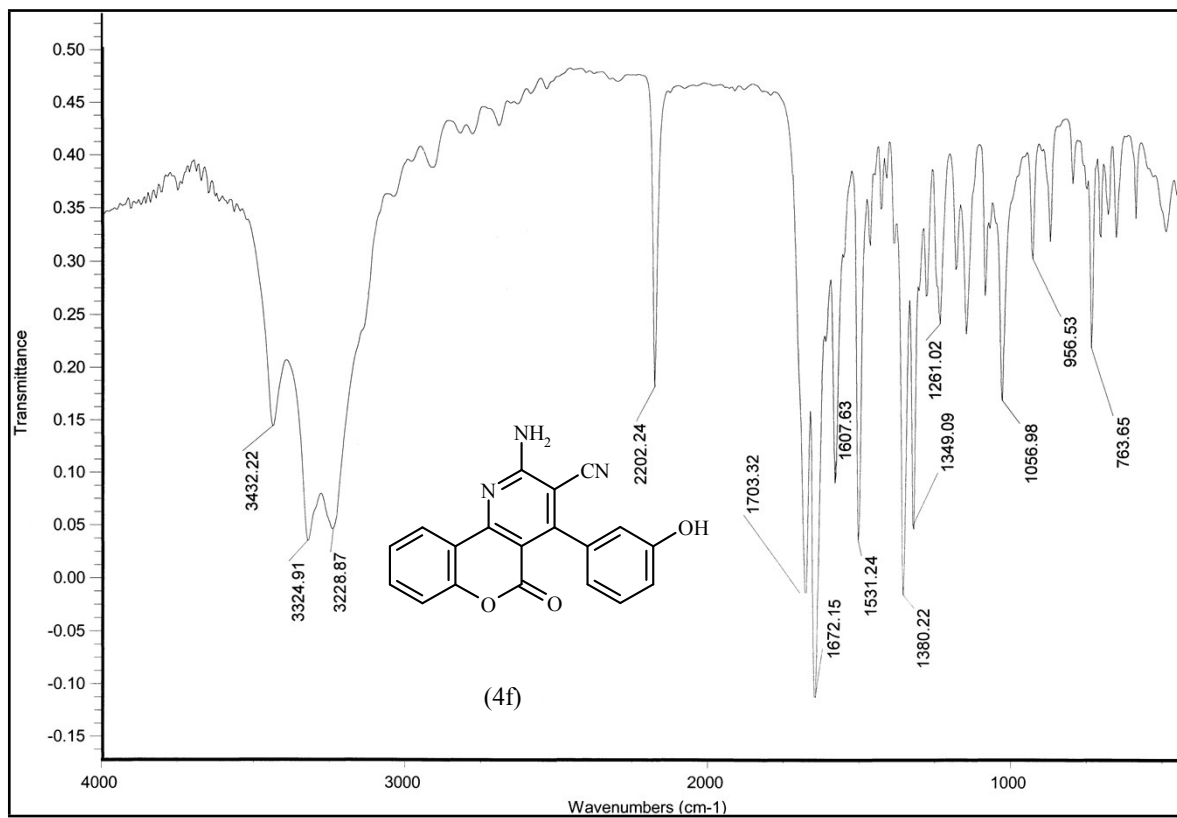

<sup>1</sup>H-NMR of 4f

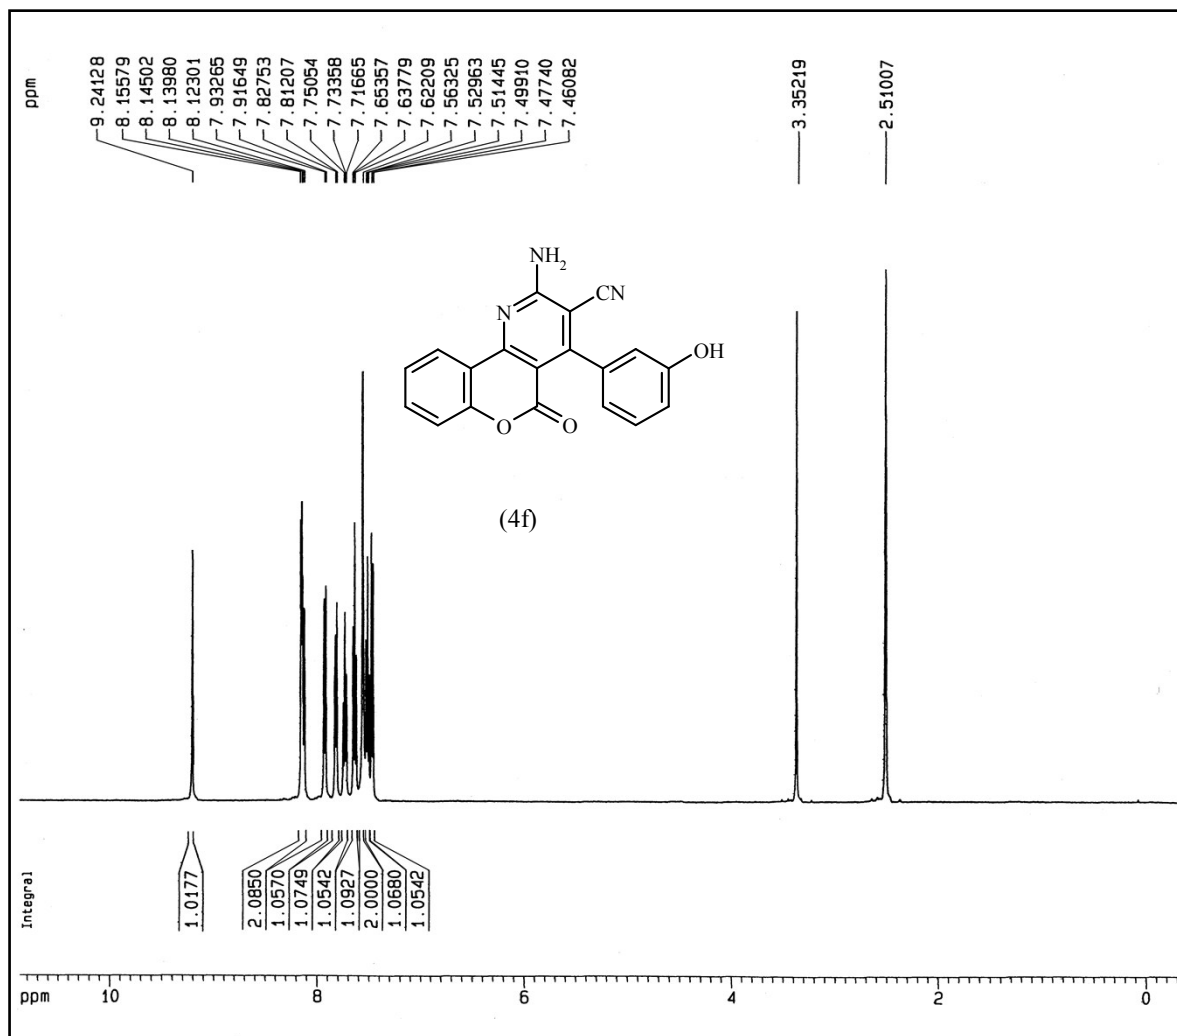

<sup>13</sup>C-NMR of 4f

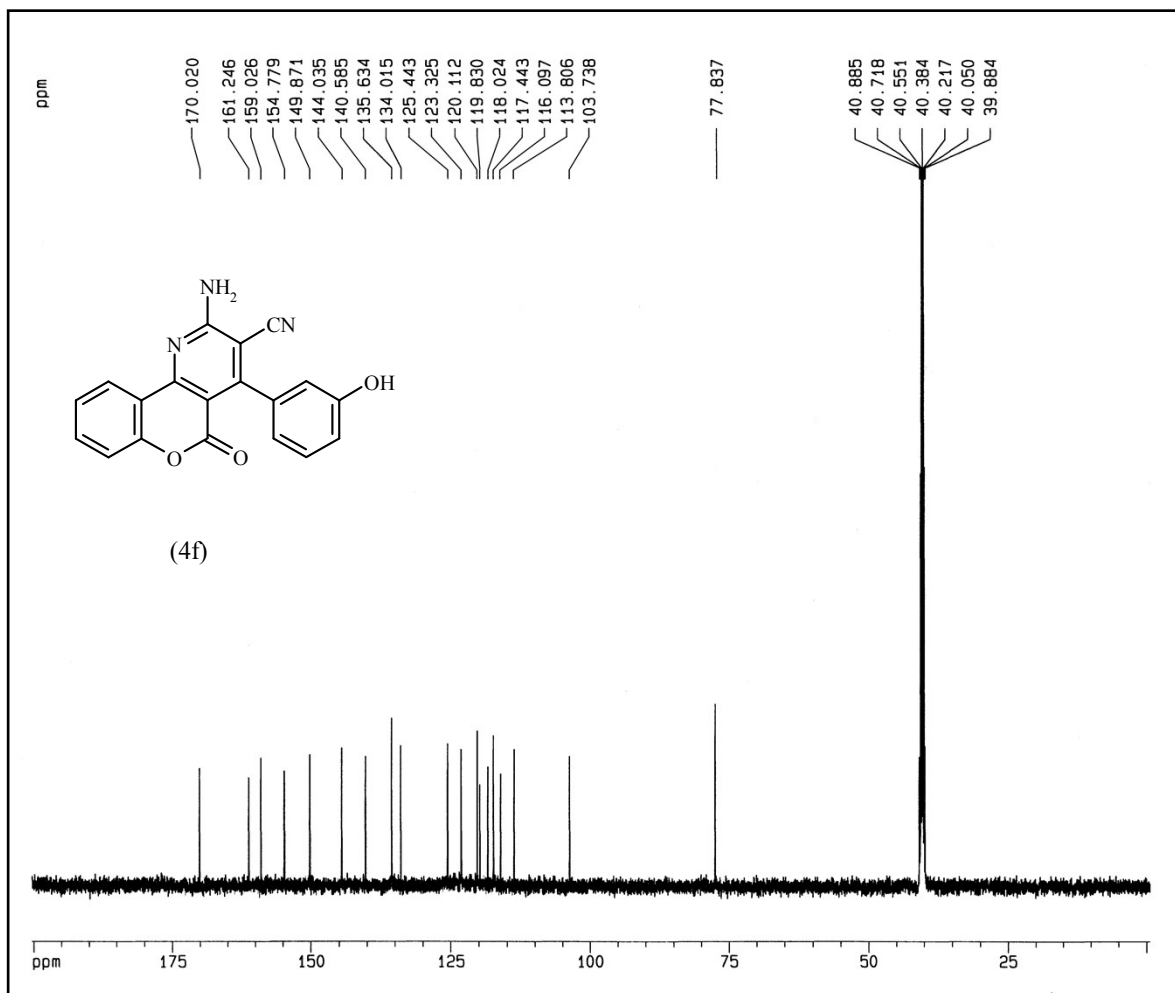

# IR of 4h

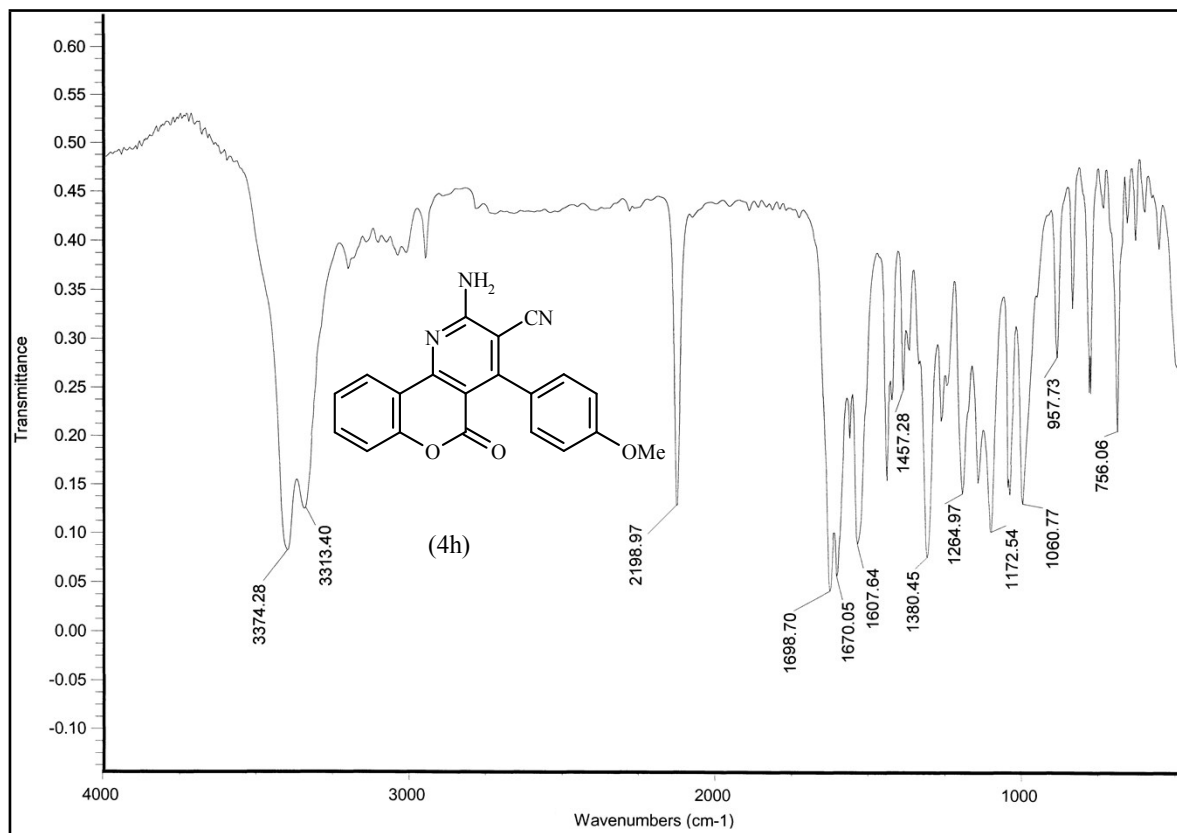



<sup>1</sup>H-NMR of 4h

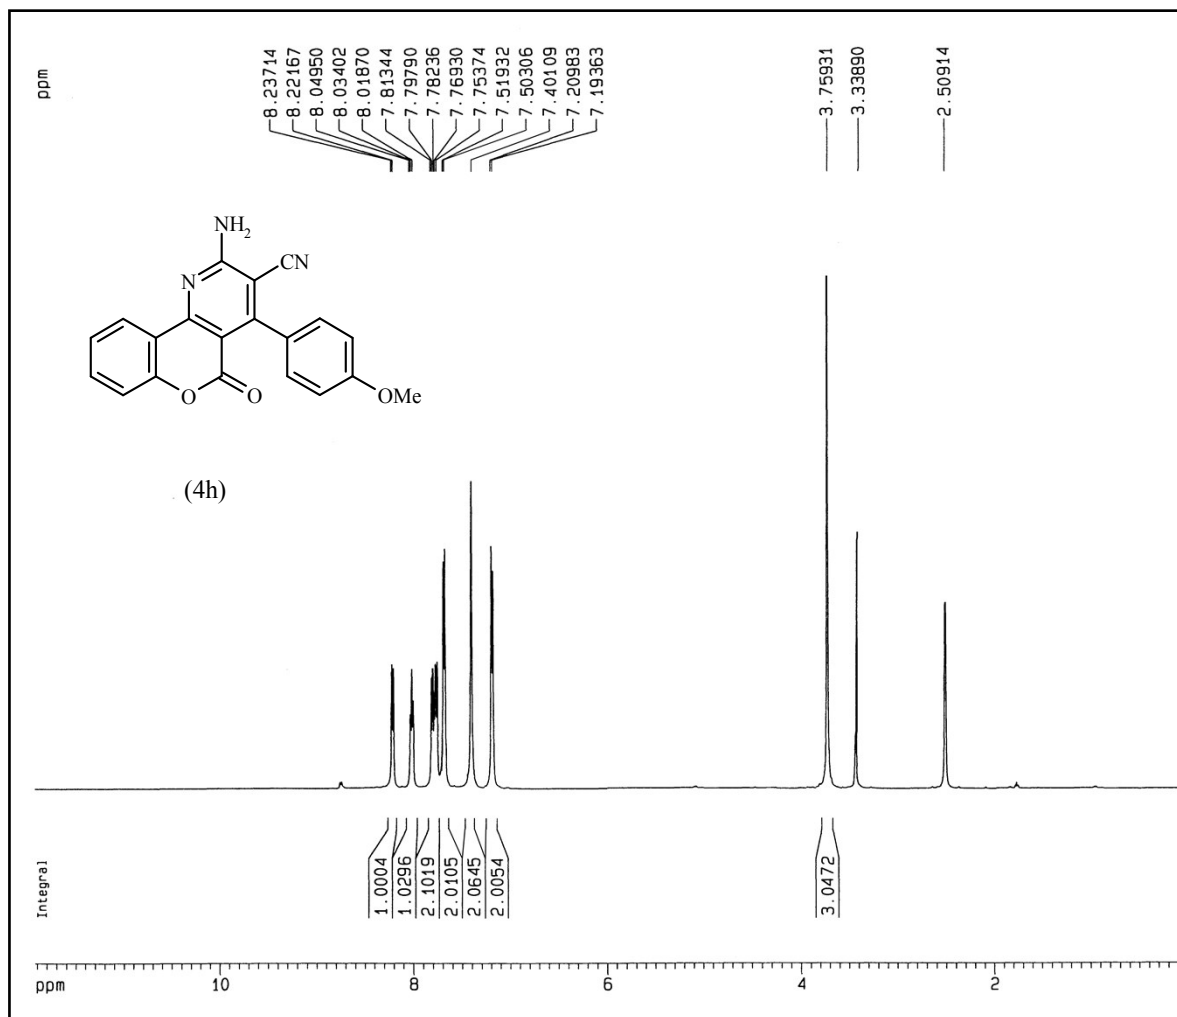

<sup>13</sup>C-NMR of 4h

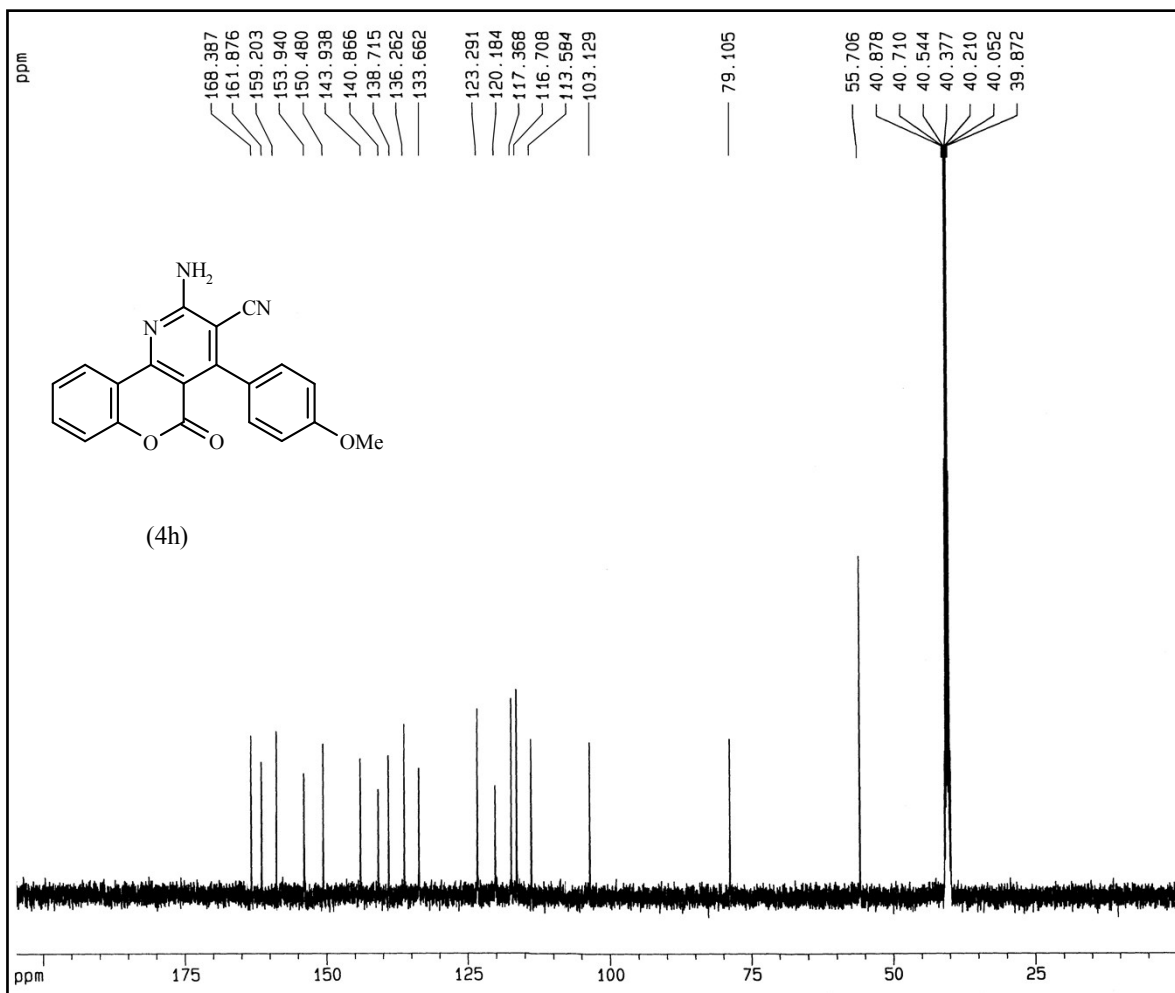

# IR of 4i

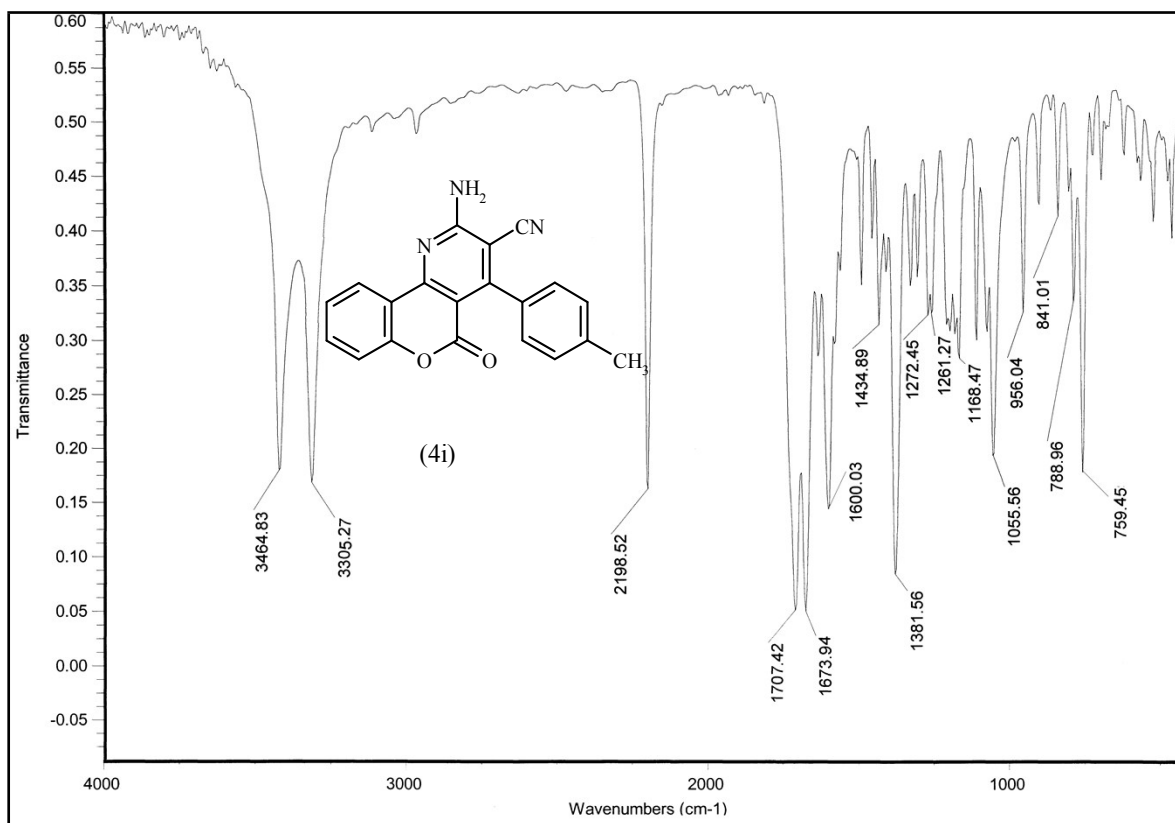

<sup>1</sup>H-NMR of 4i

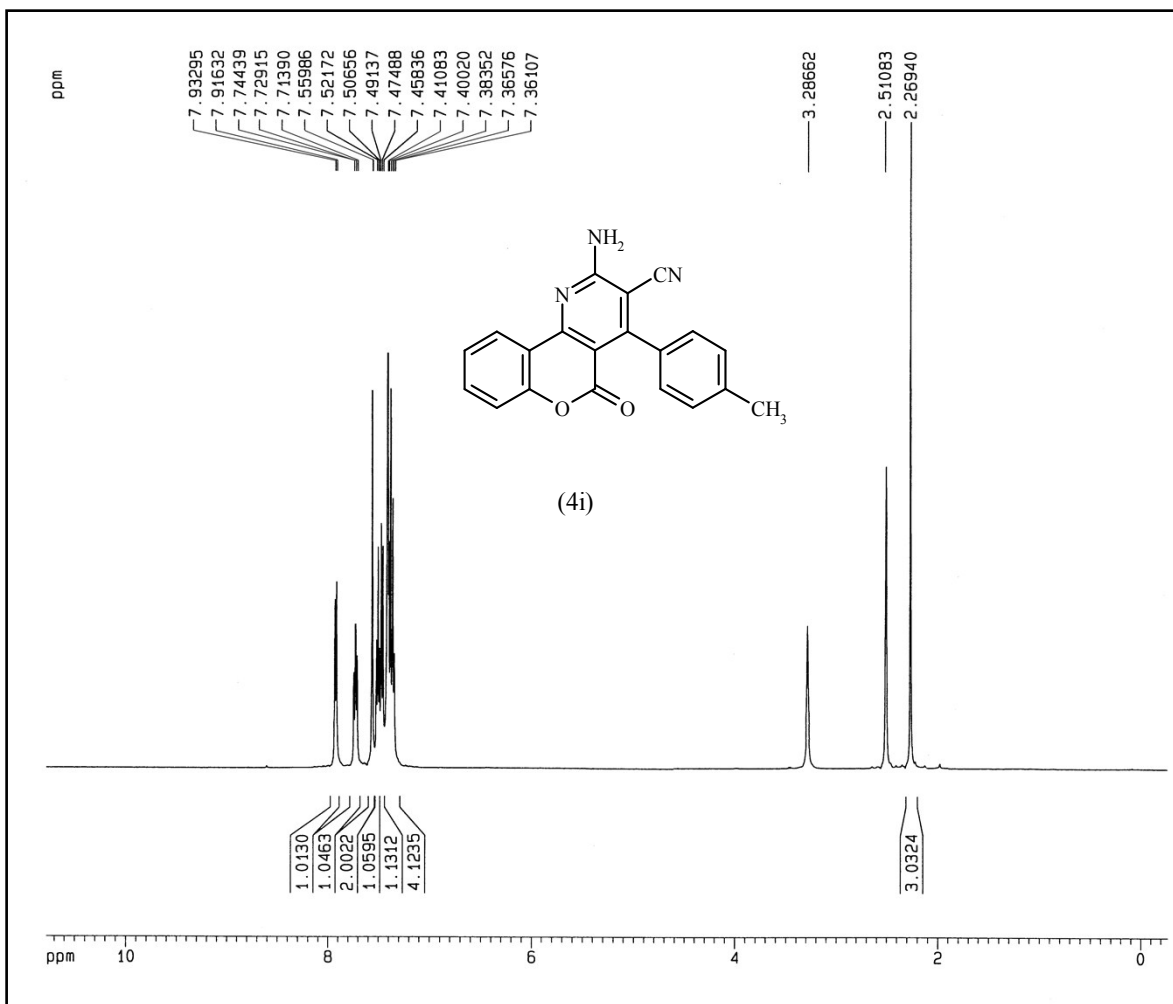

<sup>13</sup>C-NMR of 4i

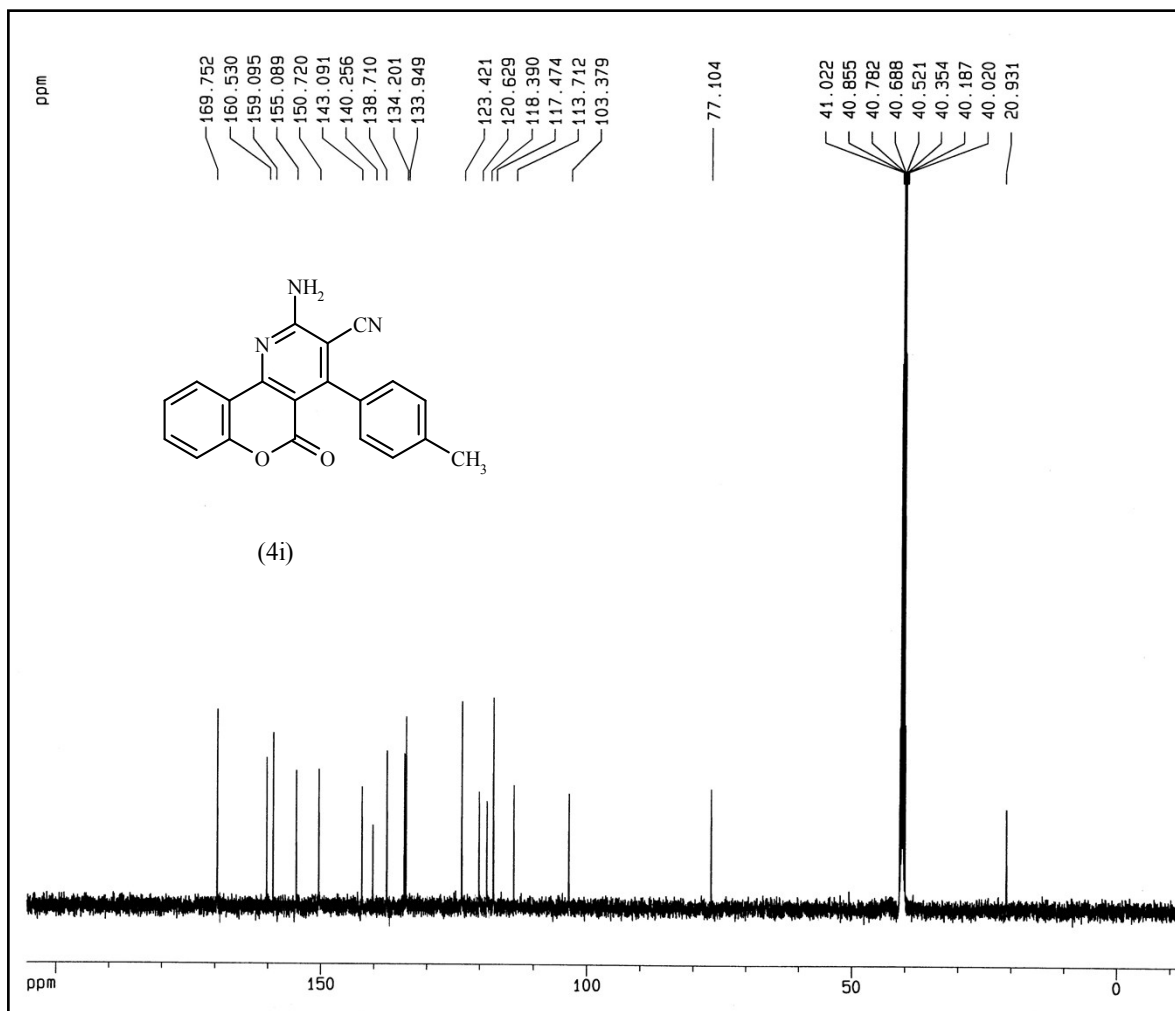

# IR of 4j

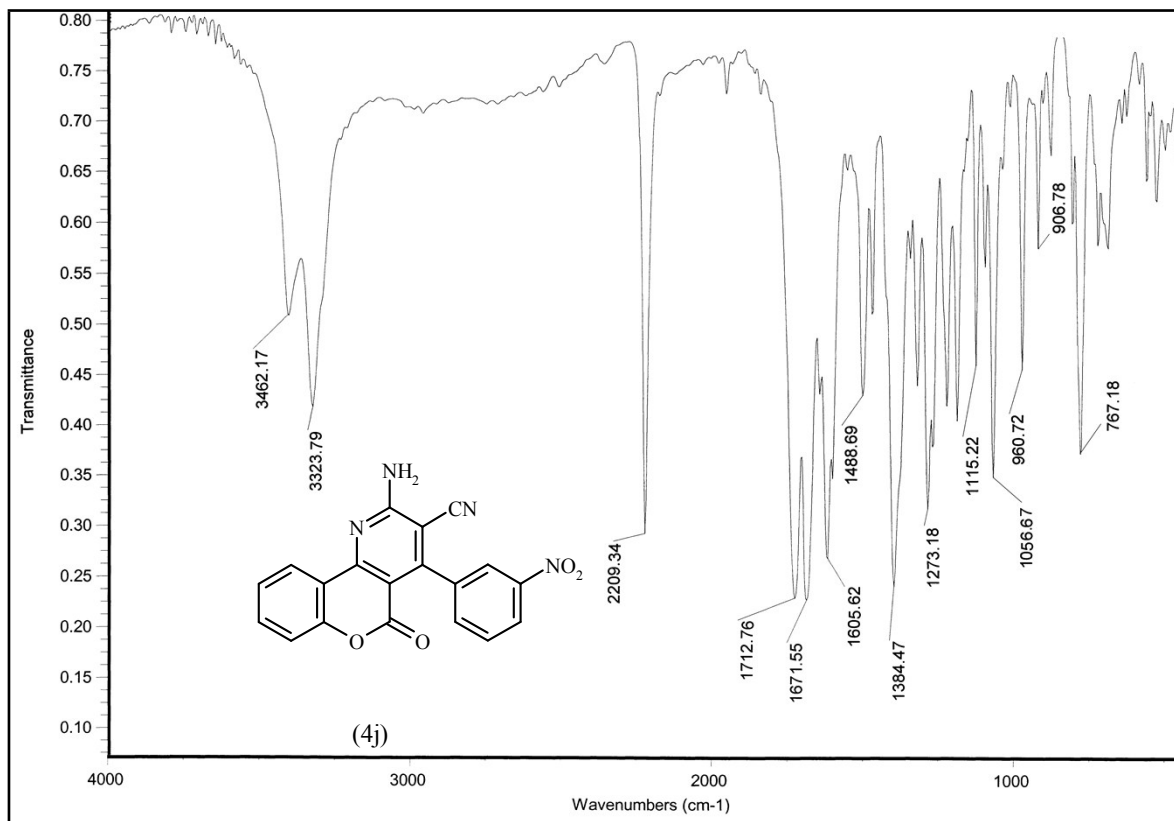

<sup>1</sup>H-NMR of 4j

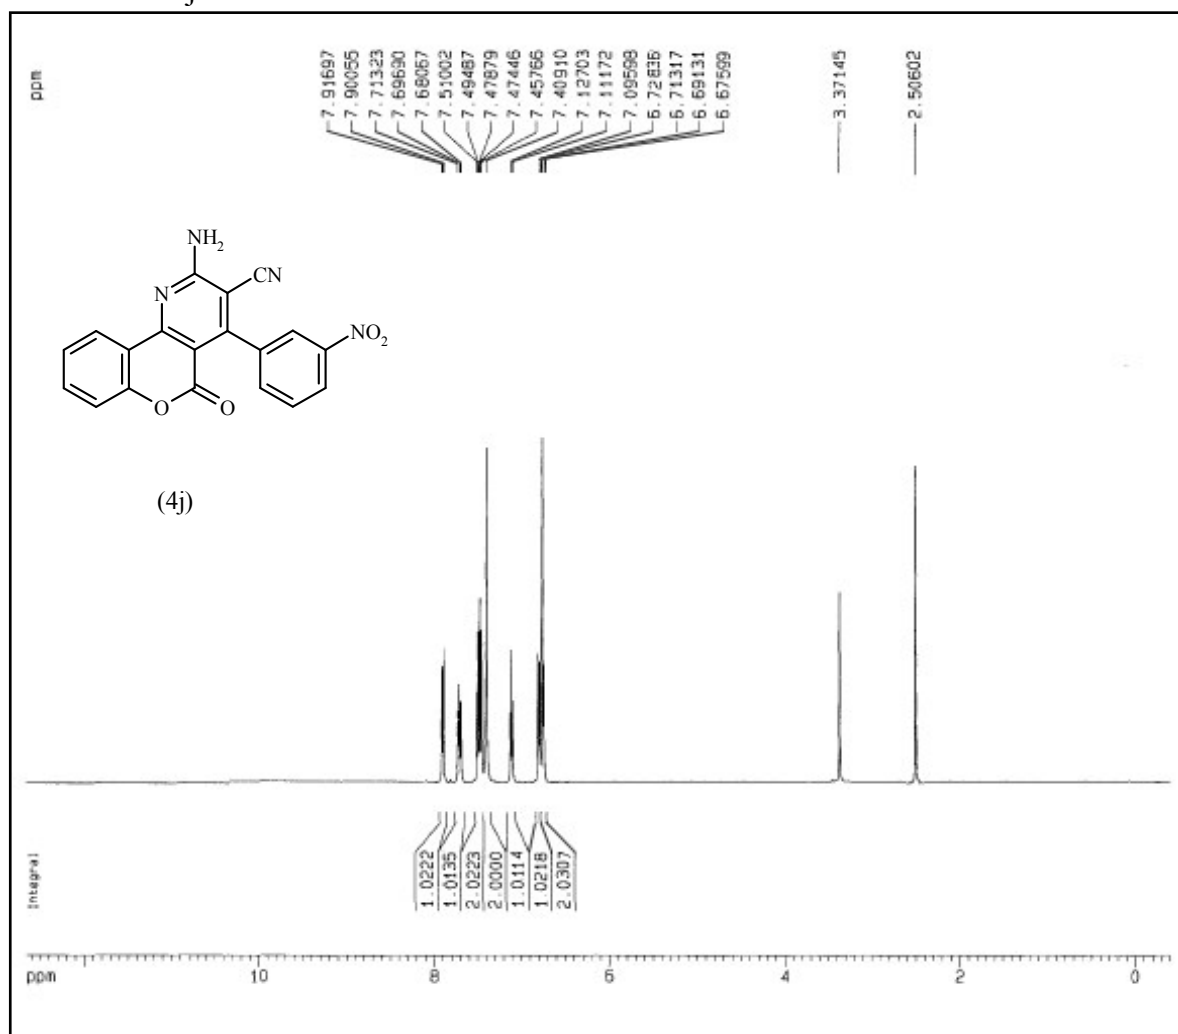

<sup>13</sup>C-NMR of 4j

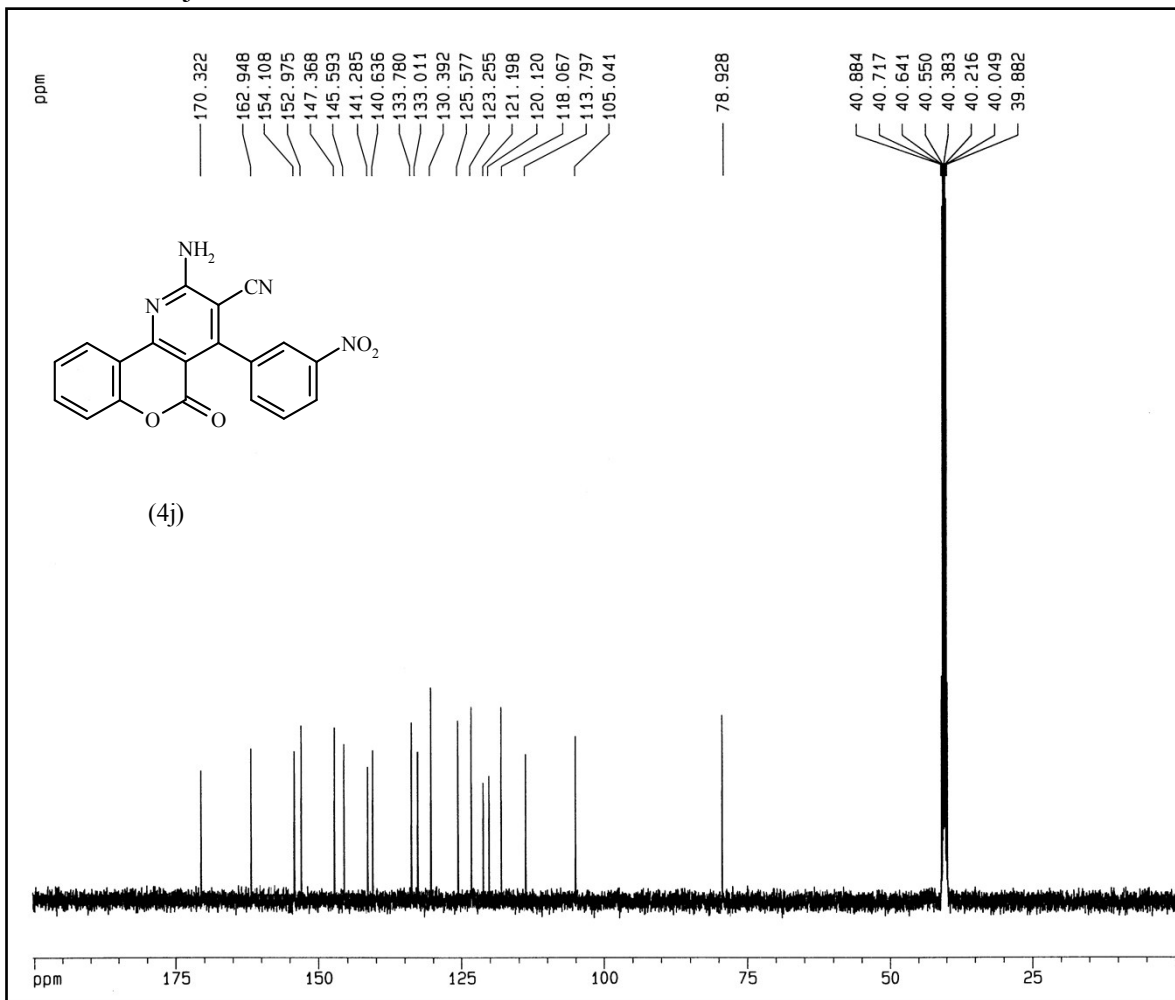



# IR of 4k

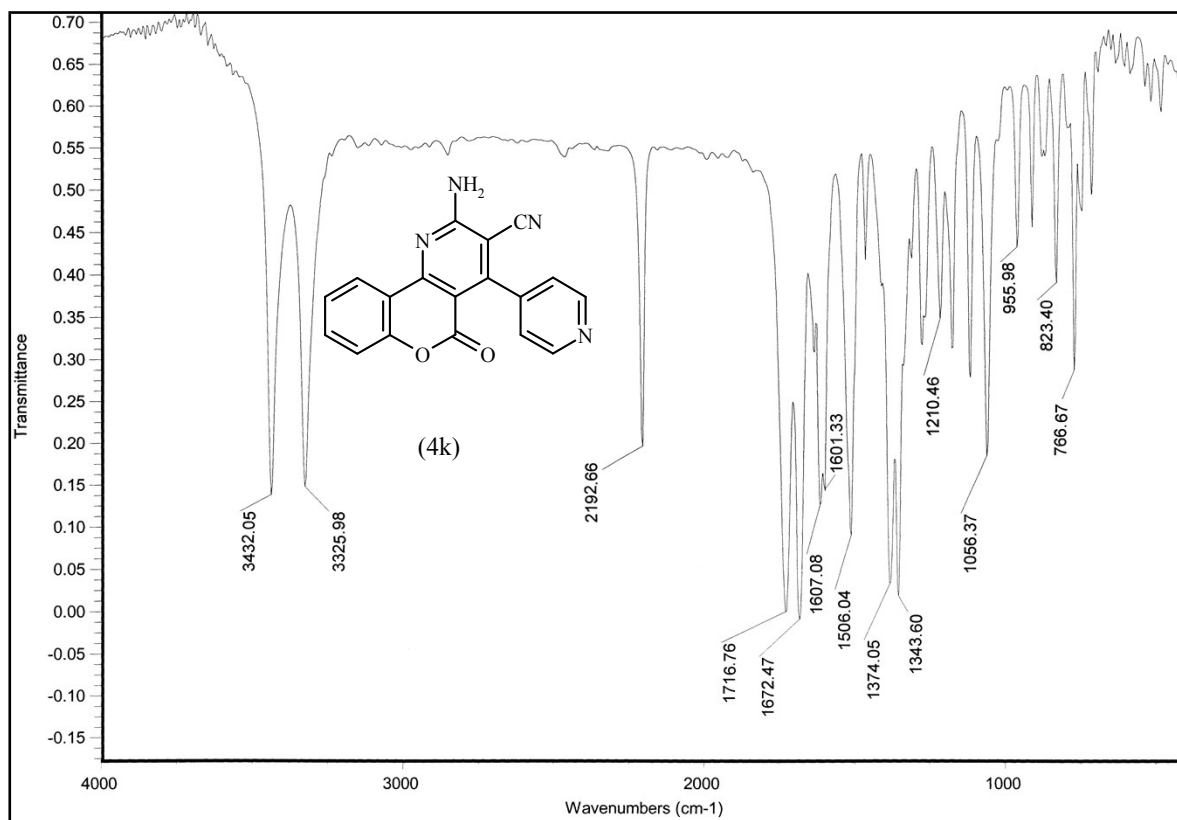

<sup>1</sup>H-NMR of 4k

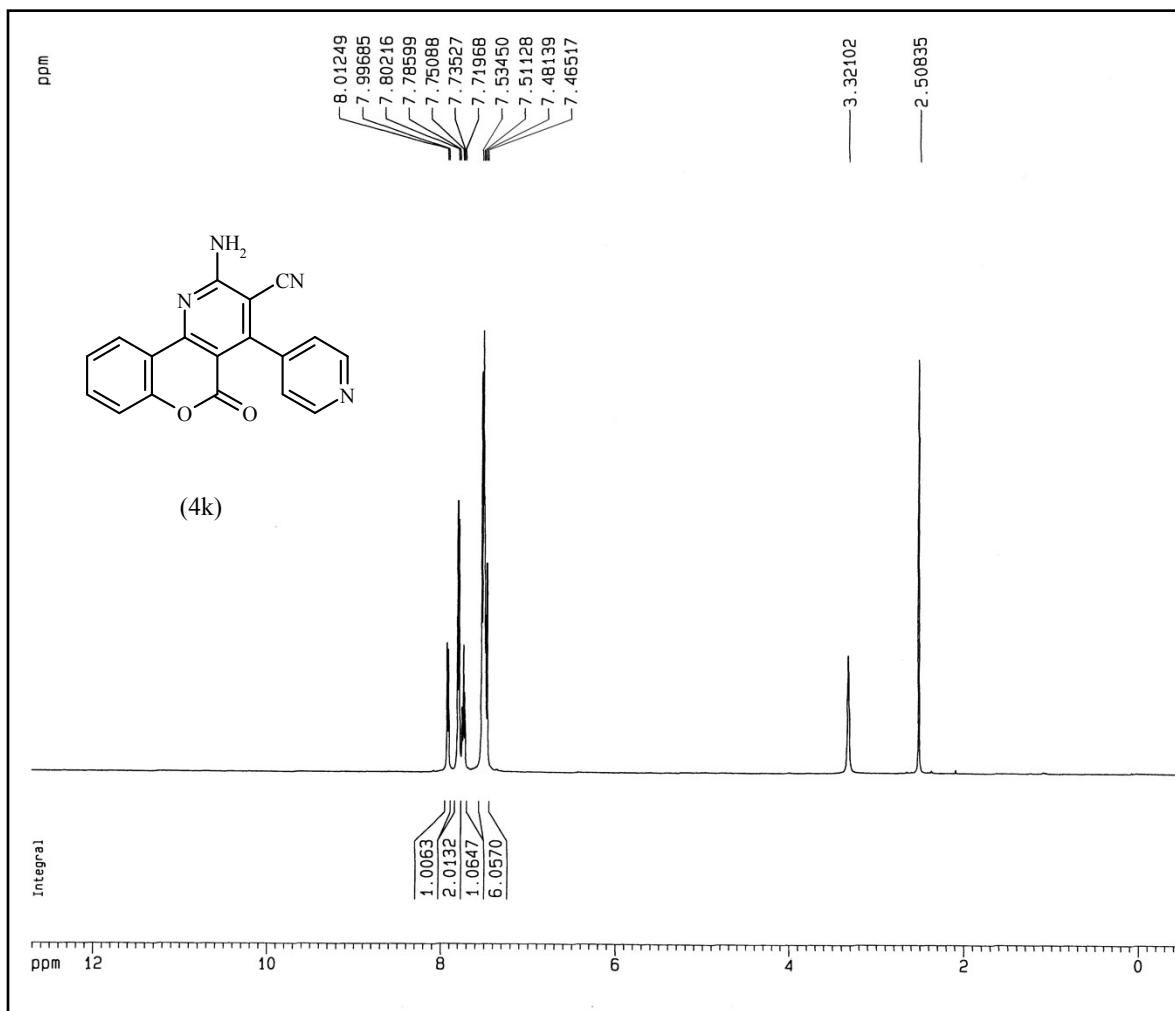

<sup>13</sup>C-NMR of 4k

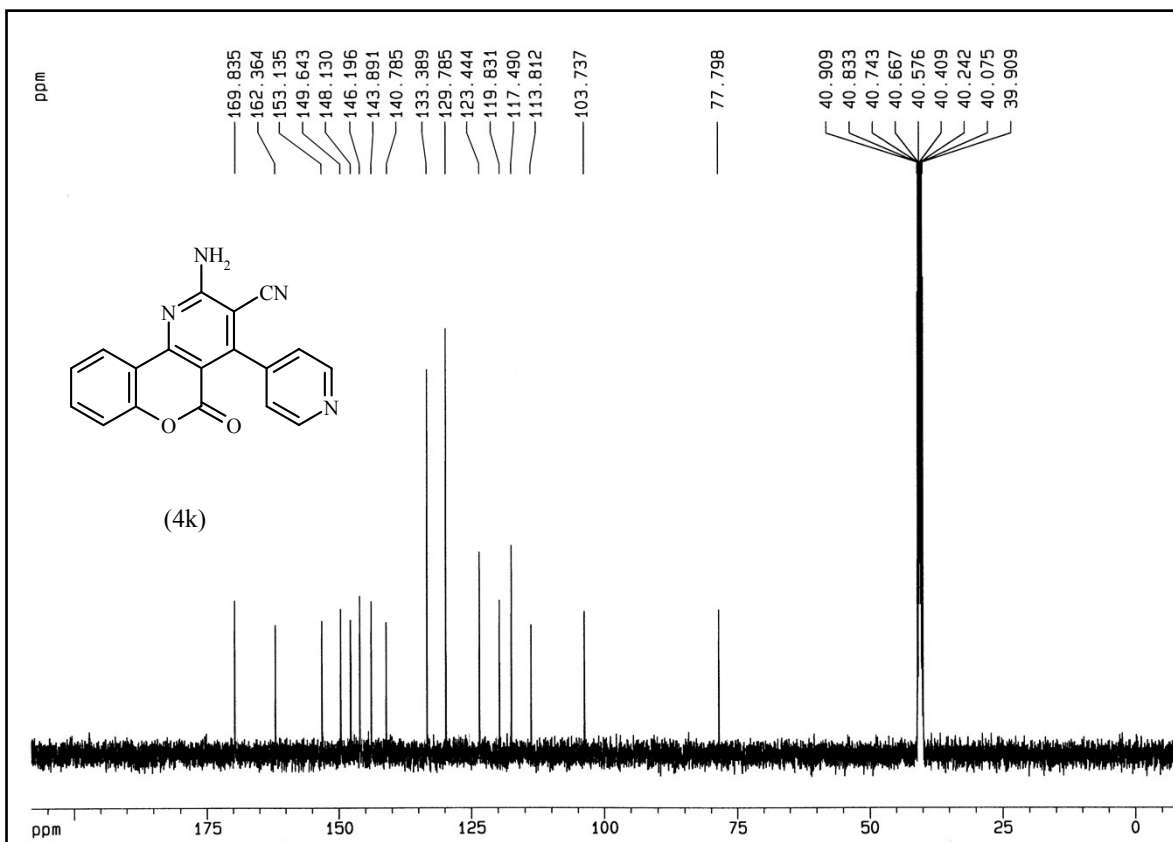

# IR of 4l

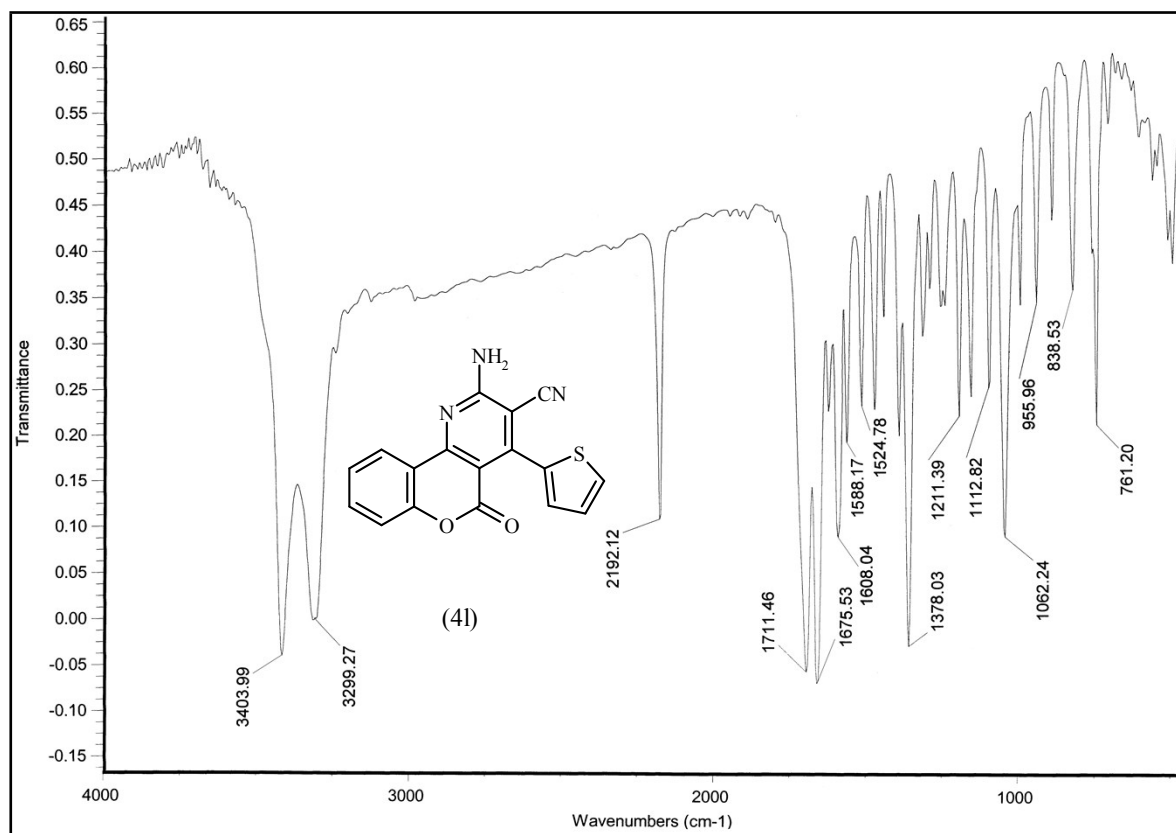

# <sup>1</sup>H-NMR of 4l

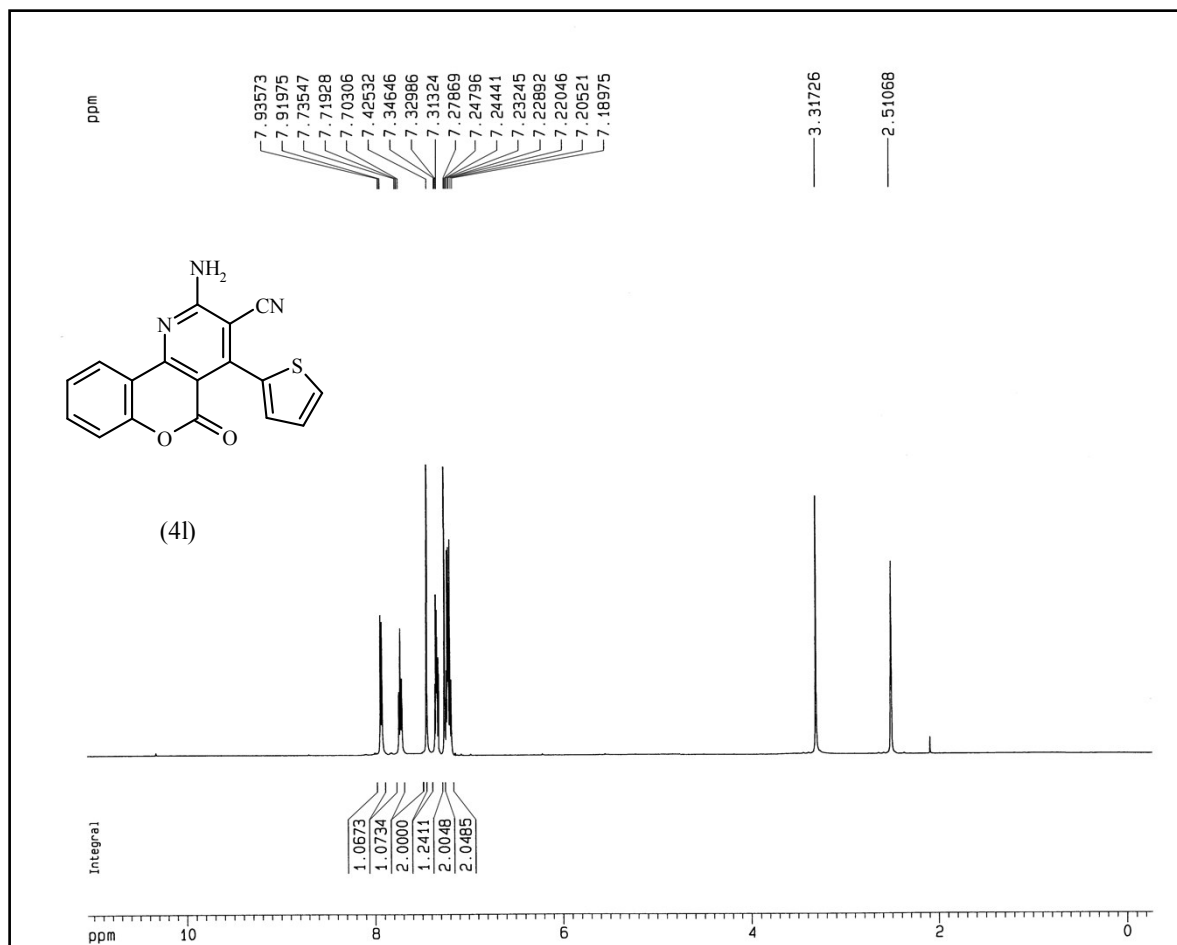

<sup>13</sup>C-NMR of 4l

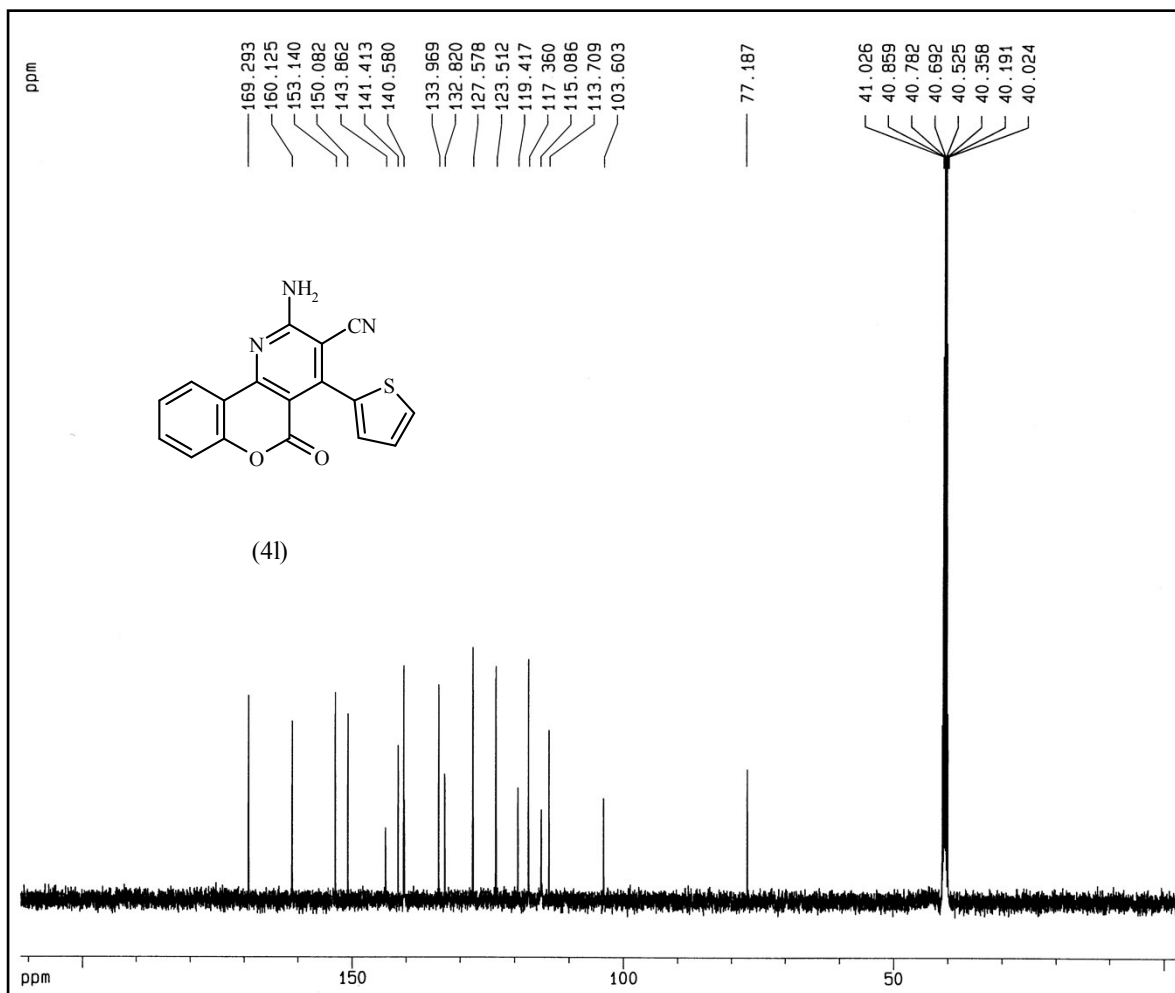

Supplement: RA-009-C9RA09031B-s001.pdf [file RA-009-C9RA09031B-s001.pdf]
